# Supplementary material
Source: ML conference proceedings conference paper supplement (https://openreview.net/forum?id=8SPVLtUvVy)
Supplement: supplementary_material [file attachment]

561  
562

## Appendices: Self-Supervised Learning via Maximum Entropy Coding

### 563 A Pseudocode of MEC

---

**Algorithm 1** PyTorch-like pseudocode of MEC

---

```
# f: encoder consisting of a backbone and a projector
# mu: a constant related to m and d
# lamda: a hyperparameter determined by the distortion
# n: the order of Taylor expansion

for x in loader: # load a minibatch x with m samples
    x1, x2 = aug(x), aug(x) # augmentation
    z1, z2 = f(x1), f(x2) # 12 normalized embeddings: [m, d] each

    loss = mec(z1, z2, mu, lamda, n)
    loss.backward()
    update(f) # optimizer update of f

# the loss of mec
def mec(z1, z2, mu, lamda, n):
    c = lamda*mm(z1, z2.t()) # [m, m] batch-wise
    # c = lamda*mm(z1.t(), z2) # [d, d] feature-wise
    power = c
    sum_p = zeros_like(power)
    for k in range(1, n+1): # n>1 for symmetric nets
        if k > 1 :
            power = mm(power, c)
        if (k + 1) % 2 == 0:
            sum_p += power / k
        else:
            sum_p -= power / k
    loss = -mu * trace(sum_p)
    return loss
```

---

**Notes:** mm is matrix multiplication. t() is transpose.

### 564 B CIFAR-10 Experiments

565 In this section, we detail the setting of the preliminary experiment described in Figure 4 in the  
566 main text. We train two models with different hyperparameters  $\epsilon = 0.12$  and  $\epsilon = 0.01$ . After  
567 training, we extract representations of the CIFAR-10 training set and employ T-SNE [66] to map  
568 the representation to a two-dimensional space for visualization. Besides the hyperparameter  $\epsilon$ , other  
569 training configurations are kept identical and detailed below. Following the practice in [14], we do not  
570 use blur augmentation, and adopt the CIFAR variant of ResNet-18 [31] as backbone. Specifically, we  
571 remove the first max-pooling layer of ResNet-18, and set the kernel size of the first convolution layer  
572 to 3. The last classification layer is also removed and we treat the features after global average pooling  
573 as inputs to the projector, which is a two-layer MLP with BN [35] and ReLU [46] applied. The  
574 dimension of the output representation is 2048. We use SGD optimizer with weight decay = 0.0005,  
575 momentum = 0.9, and set the base learning rate to 0.03, which is linearly scaled with the batch size  
576 of 256. The learning rate is scheduled to a cosine decay rate for 600 epochs.

### 577 C Implementation Details.

578 **Data augmentations.** We adopt the same set of data augmentations following the common practice  
579 of previous methods [12, 27, 81, 14, 15], which is composed of geometric, color, and blurring

580 augmentations. The geometric augmentations include random cropping, resizing to  $224 \times 224$ , and  
581 random horizontal flipping. The color augmentations consist of a random sequence of brightness,  
582 contrast, saturation, hue adjustments, and a grayscale conversion. The blurring augmentations  
583 include Gaussian blurring and solarization. We use the same augmentation parameters as BYOL [27]  
584 and Barlow Twins [81]. For each iteration, each image is augmented twice to generate two views  
585 according to the above augmentation policy.

586 **Architecture.** We use a standard ResNet-50 network [31] without the final classification layer as  
587 the backbone, which yields a feature with dimension of 2048. It is followed by a projector network,  
588 which is a three-layer MLP with BN [35] and ReLU [46] applied, and each with 2048 output units.  
589 A momentum encoder is utilized to stabilize the training and further improve the performance. We  
590 turn one branch of the Siamese networks as online network and the other as target network, whose  
591 parameters are an exponential moving average of the online parameters. For the asymmetric network  
592 design, we append a two-layer MLP only to the online branch, and it has hidden dimension 512 and  
593 output dimension 2048 with BN [35] and ReLU [46] applied to the first layer. The output embeddings  
594 of the two branches are fed to the objective function for self-supervised pre-training. And after  
595 pre-training, we only keep the encoder for downstream tasks.

596 **Optimization.** We use the SGD optimizer with a cosine decay learning rate schedule [42] and a  
597 linear warm-up period of 10 epochs. The weight decay is  $1.0 \times 10^{-5}$  and the momentum is 0.9.  
598 We set the base learning rate to 0.5, which is scaled linearly [26] with a batch size of 256 (*i.e.*,  
599  $\text{LearningRate} = 0.5 \times \text{BatchSize}/256$ ). The exponential moving average parameter is increased from  
600 0.996 to 1 with a cosine scheduler. We set the level of distortion  $\epsilon_d^2 = 0.06$  and use a batch size of  
601 1024. To enable large-batch and faster pre-training of 800 epochs, we adopt the LARS optimizer [79]  
602 with a batch size of 4096 and set the base learning rate to 0.3 and weight decay to  $1.5 \times 10^{-6}$ . We  
603 use the 800-epoch pre-trained model for downstream tasks. To give an intuition of the computation  
604 overhead of our method, it takes MEC 42 hours for 100-epoch pre-training on 8 V100 GPUs, while it  
605 takes BYOL and Barlow Twins 45 and 48 hours on the same hardware.

606 **Linear probing.** We adopt the standard linear probing protocol [12, 14, 27, 81] and train a supervised  
607 linear classifier on top of the frozen representation. We use the LARS optimizer [79] with a batch size  
608 of 4096 and a base learning rate of 0.05, and a cosine learning rate schedule over 100 epochs. The  
609 momentum is 0.9 and the weight decay is set to 0. During training, the input images are augmented by  
610 taking a random crop, resizing to  $224 \times 224$ , and flipping horizontally. At test time, we resize the  
611 image to  $256 \times 256$  and then center-crop it to a size of  $224 \times 224$ .

612 **Semi-supervised classification.** We follow the semi-supervised learning protocol of [12, 81, 27] and  
613 fine-tune the pre-trained model on the 1% and 10% subset of ImageNet [17] training set, using the  
614 same splits as in SimCLR [12]. We use the SGD optimizer with a batch size of 1024 and a momentum  
615 of 0.9. And we set the weight decay to 0. We use a base learning rate of 0.05 and fine-tune the model  
616 for 50 epochs. The data augmentations are the same as in linear probing.

617 **Object detection and instance segmentation.** We follow the common practice of previous meth-  
618 ods [29, 13, 14, 81] and evaluate the transfer learning performance based on Detectron2 library [74].  
619 We initialize the backbone ResNet-50 for Faster R-CNN [56] and Mask R-CNN [30] using our  
620 pre-trained model. All Faster/Mask R-CNN models are with the C4-backbone. We fine-tune the  
621 model end-to-end in the target datasets with a searched learning rate and keep all other parameters  
622 the same as in Detectron2 library [74]. We use the VOC07+12 trainval set of 16K images for  
623 training the Faster R-CNN model for 24K iterations using a batch size of 16 across 8 GPUs. The  
624 initial learning rate is reduced by a factor of 10 after 18K and 22K iterations. We also train the model  
625 using only the VOC07 trainval set of 5K images with smaller iterations according to the dataset  
626 size. We report results on VOC07 test averaged over 5 runs. We train the Mask R-CNN model ( $1 \times$   
627 schedule) on the COCO 2017 train split and report results on the val split.

628 **Object tracking.** We further evaluate the generalization capability of the learned representations on  
629 five video tasks, including single object tracking (SOT) [73], video object segmentation (VOS) [52],

630 multi-object tracking (MOT) [44], multi-object tracking and segmentation (MOTS) [68] and pose  
 631 tracking (PoseTrack) [1]. The datasets and metrics used for the above tasks are as follows:

| Task    | SOT           | VOS                 | MOT          | MOTS         | PoseTrack               |
|---------|---------------|---------------------|--------------|--------------|-------------------------|
| Dataset | OTB 2015 [73] | DAVIS 2017 [52]     | MOT 16 [44]  | MOTS [68]    | PoseTrack 2017 [1]      |
| Metrics | AUC           | $\mathcal{J}$ -mean | IDF1<br>HOTA | IDF1<br>HOTA | IDF1<br>ID-switch (IDs) |

633 All evaluations are based on the platform of UniTrack [71], where no additional fine-tuning is required.  
 634 UniTrack [71] consists of a single and task-agnostic appearance model, which is initialized using our  
 635 pre-trained model, and multiple heads to directly address different tasks without further training.

636 **Details of Figure 1.** In Figure 1 of the main paper, we make a comparison of transfer learning perfor-  
 637 mance on five image-based tasks and five video-based tasks. The image-based tasks include linear  
 638 probing (top-1 accuracy) with 800-epoch pre-trained models (LIN), semi-supervised classification  
 639 (top-1 accuracy) using 1% subset of training data (SEMI), object detection (AP) on VOC dataset  
 640 (VOC) and COCO dataset (COCO), instance segmentation ( $AP^{\text{mask}}$ ) on COCO dataset (SEG). For  
 641 video-based tasks, we compute rankings in terms of AUC,  $\mathcal{J}$ -mean, IDF-1, IDF-1 and IDF-1 for  
 642 SOT, VOS, MOT, PoseTracking, and MOTS, respectively.

## 643 D Additional Results

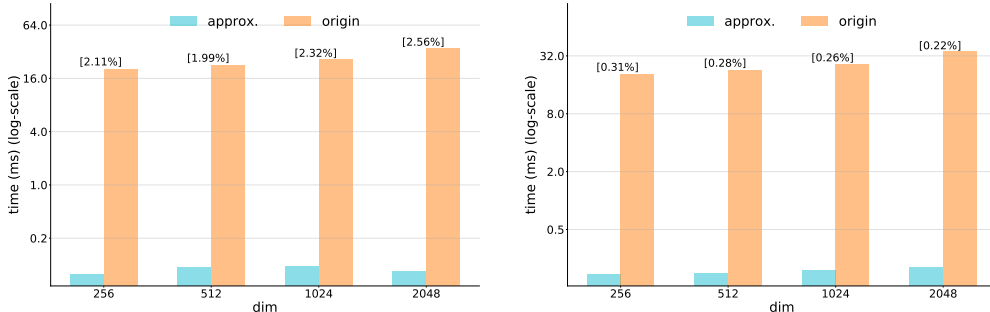

Figure 6: Comparison of running time and relative approximation error between Equation (1) (origin) and Equation (2) (approx.) for different number of samples in  $Z$  (dim). Left plot: first-order approximation; Right plot: second-order approximation.

644 **Approximation with low-order expansion.** In Section 2.1 of the main paper, we make a comparison  
 645 between original Equation (1) and our approximation using four terms of Equation (2). In this section,  
 646 we provide additional comparisons using lower-order approximations. As can be seen in Figure 6,  
 647 the computation process of coding length function can be even faster (*e.g.*, 0.11ms *v.s.* 35.48ms for  
 648 dim 2048) with first-order approximation. But we also notice that the relative approximation error  
 649 increases to 2.56%, while it is 0.22% and 0.07% for second-order and fourth-order approximation,  
 650 respectively. Such approximation errors may account for the reason of performance drop on linear  
 651 probing (Table 5e) and other downstream tasks (Section 3.4).

Table 7: Comparison of linear probing results on ImageNet [17] with state-of-the-art methods. The results are reported in their original papers. † indicates methods using a projector network with large dimensions. ‡ indicates methods using multi-crop augmentation.

| method   | MEC‡ | MEC† | MEC  | BYOL [27] | SimSiam [14] | Barlow [81]† | VICReg [5]† | DINO [11]‡ | UniGrad [61]†‡ |
|----------|------|------|------|-----------|--------------|--------------|-------------|------------|----------------|
| epoch    | 800  | 800  | 800  | 1000      | 800          | 1000         | 1000        | 800        | 800            |
| accuracy | 75.5 | 75.1 | 74.5 | 74.3      | 71.3         | 73.2         | 73.2        | 75.3       | 75.5           |

652 **Pre-training with additional strategies.** In Section 3.2 of the main paper, we make a comparison  
 653 of linear probing results with different methods. And in Table 1, each method is pre-trained with

654 two  $224 \times 224$  views for a fair comparison. We notice that there are multiple other strategies for  
 655 self-supervised pre-training, so we provide additional experiment results in Table 7 by incorporating  
 656 two widely used strategies, *i.e.*, multi-crop augmentation [10, 11] and large projector network [81,  
 657 5, 61]. Multi-crop augmentation uses additional smaller crops as local views (six  $96 \times 96$  views  
 658 following [10]). A larger projector network increases the dimension of each MLP layer (from 2048 to  
 659 8192 following [81, 5, 61]). We find these strategies can steadily improve the performance of MEC  
 660 at the cost of more computation overhead.

| Method                 | Food101     | CIFAR10     | CIFAR100    | SUN397      | Cars        | Aircraft    | VOC2007     | DTD         | Pets        | Caltech-101 | Flowers     |
|------------------------|-------------|-------------|-------------|-------------|-------------|-------------|-------------|-------------|-------------|-------------|-------------|
| <i>Linear probing:</i> |             |             |             |             |             |             |             |             |             |             |             |
| Supervised [12]        | 72.3        | <b>93.6</b> | 78.3        | 61.9        | 66.7        | <b>61.0</b> | <b>82.8</b> | 74.9        | <b>91.5</b> | <b>94.5</b> | 94.7        |
| SimCLR [12]            | 68.4        | 90.6        | 71.6        | 58.8        | 50.3        | 50.3        | 80.5        | 74.5        | 83.6        | 90.3        | 91.2        |
| BYOL [27]              | <b>75.3</b> | 91.3        | <u>78.4</u> | <b>62.2</b> | <b>67.8</b> | 60.6        | 82.5        | <b>75.5</b> | 90.4        | 94.2        | <b>96.1</b> |
| MEC                    | <u>75.6</u> | <b>92.1</b> | <u>78.4</u> | <b>62.7</b> | <b>67.2</b> | <u>61.5</u> | <b>82.7</b> | <u>75.8</u> | <b>90.9</b> | <u>94.6</u> | <b>96.0</b> |
| <i>Fine-tuned:</i>     |             |             |             |             |             |             |             |             |             |             |             |
| Random init [12]       | 86.9        | 95.9        | 80.2        | 53.6        | 91.4        | 85.9        | 67.3        | 64.8        | 81.5        | 72.6        | 92.0        |
| Supervised [12]        | 88.3        | 97.5        | <b>86.4</b> | <b>64.3</b> | <b>92.1</b> | 86.0        | 85.0        | 74.6        | <b>92.1</b> | 93.3        | <b>97.6</b> |
| SimCLR [12]            | 88.2        | 97.7        | 85.9        | 63.5        | 91.3        | <b>88.1</b> | 84.1        | 73.2        | 89.2        | 92.1        | 97.0        |
| BYOL [27]              | <b>88.5</b> | <u>97.8</u> | 86.1        | 63.7        | <b>91.6</b> | <b>88.1</b> | <b>85.4</b> | <u>76.2</u> | 91.7        | <b>93.8</b> | 97.0        |
| MEC                    | <u>88.9</u> | <u>97.8</u> | <u>86.8</u> | <b>63.8</b> | <b>91.6</b> | <u>88.5</u> | <u>85.9</u> | <b>76.0</b> | <b>91.9</b> | <u>94.9</u> | <b>97.2</b> |

Table 8: Transfer learning to other classification tasks with ImageNet [17] pre-trained model. The top-2 model for each dataset is **bolded** and the best model is underlined.

661 **Transfer learning across different image domains.** In the experiments (Section 3) of the main  
 662 paper, we have evaluated the transfer learning performance on a wide variety of image- and video-  
 663 based downstream tasks. In this section, to further evaluate whether the learned representations can  
 664 generalize across different image domains, we transfer the pre-trained model to other classification  
 665 tasks by linear probing and fine-tuning on 11 datasets. The results in Table 8 demonstrate that MEC’s  
 666 representation is more generalizable and less biased compared to the supervised baseline and other  
 667 models pre-trained with specific pretext tasks, consistent with the observations in the main paper.

## 668 E Limitations and Future Work

669 The estimation of entropy from a finite set of high-dimensional vectors is itself a challenging problem  
 670 in the field of statistical learning. So in this work, as an exploration of the principle of maximum  
 671 entropy in self-supervised learning, we opt to exploit a computationally tractable surrogate for  
 672 the entropy of representations. In order to facilitate large-scale pre-training, we further leverage  
 673 Taylor series expansion to accelerate the computation process and we notice that more theoretical  
 674 investigation is needed for the empirical convergence of small distortion. Future work can seek a  
 675 more direct entropy estimator for maximum entropy coding. The proposed method aims to alleviate  
 676 the bias introduced by the specific pretext task, and we notice that the bias can also be introduced by  
 677 the designed data augmentations, which is a common problem in current self-supervised learning  
 678 methods. Future work may seek automated data augmentation strategies and further generalize the  
 679 proposed method to other modalities (*e.g.*, audio, text).

## 680 F Broader Impact

681 As the first method that introduces the principle of maximum entropy into self-supervised learning,  
 682 the presented work may inspire more methods leveraging this principle towards learning generalizable  
 683 representations, which is the core of self-supervised learning. As we demonstrate in the experiments,  
 684 the proposed method positively contributes to a wide variety of vision tasks, such as image classifi-  
 685 cation, object detection and tracking. However, there is also a potential that the proposed method  
 686 has negative societal impacts for a particular use of the applications. The proposed method learns

687 representations from large-scale datasets and the learned representations may reflect the data biases  
 688 inherent in the datasets.

## 689 G Licenses of Assets

690 CIFAR-10 [39] is subject to MIT license. VOC [23] data includes images obtained from the Flickr  
 691 website and use of these images is subject to the Flickr terms of use. COCO [40] is subject to the  
 692 Creative Commons Attribution 4.0 License. ImageNet [17] is subject to the licenses on the website<sup>1</sup>.

## 693 H More Detailed Proofs

694 **Proof of Equation (2).** First, we rewrite Equation (1) by substituting  $\mu = \frac{m+d}{2}$  and  $\lambda = \frac{d}{m\epsilon^2}$ , and  
 695 then we can obtain the following simplified equation,

$$L = \mu \log \det \left( \mathbf{I}_m + \lambda \mathbf{Z}^\top \mathbf{Z} \right). \quad (5)$$

696 Next, we utilize the following identical equation [33],

$$\det(\exp(\mathbf{A})) = \exp(\text{Tr}(\mathbf{A})), \quad (6)$$

697 and then we take logarithm of the both side of the above equation, which gives,

$$\log \det(\exp(\mathbf{A})) = \text{Tr}(\mathbf{A}). \quad (7)$$

698 Let  $\mathbf{A} = \log \left( \mathbf{I}_m + \lambda \mathbf{Z}^\top \mathbf{Z} \right)$ , then we have,

$$\log \det \left( \mathbf{I}_m + \lambda \mathbf{Z}^\top \mathbf{Z} \right) = \text{Tr} \left( \log \left( \mathbf{I}_m + \lambda \mathbf{Z}^\top \mathbf{Z} \right) \right). \quad (8)$$

699 So Equation (5) can be reformulated as,

$$\begin{aligned} L &= \mu \log \det \left( \mathbf{I}_m + \lambda \mathbf{Z}^\top \mathbf{Z} \right) \\ &= \text{Tr} \left( \mu \log \left( \mathbf{I}_m + \lambda \mathbf{Z}^\top \mathbf{Z} \right) \right). \end{aligned} \quad (9)$$

700 Finally, we apply Taylor series expansion to expand the logarithm of the matrix in the above equation,  
 701 and obtain Equation (2),

$$L = \text{Tr} \left( \mu \sum_{k=1}^{\infty} \frac{(-1)^{k+1}}{k} \left( \lambda \mathbf{Z}^\top \mathbf{Z} \right)^k \right), \quad (10)$$

702 with convergence condition:  $\left\| \lambda \mathbf{Z}^\top \mathbf{Z} \right\|_2 < 1$ .

703 **Proof of convergence condition of Equation (3).** To ensure the convergence of Equation (3), we  
 704 require,

$$\|\mathbf{C}\|_2 < 1, \quad (11)$$

705 where  $\mathbf{C} = \lambda \mathbf{Z}_1^\top \mathbf{Z}_2$  and  $\lambda = \frac{d}{m\epsilon^2} = \frac{1}{m\epsilon_d^2}$ . We note the inequality between matrix norms,

$$\|\mathbf{C}\|_2 \leq \sqrt{\|\mathbf{C}\|_1 \|\mathbf{C}\|_\infty}, \quad (12)$$

706 which is a special case of Hölder's inequality. Since 1-norm of matrix is simply the maximum  
 707 absolute column sum of the matrix, we have

$$\|\mathbf{C}\|_1 = \max_{1 \leq j \leq m} \sum_{i=1}^m |c_{ij}|. \quad (13)$$

708 Note that the columns of  $\mathbf{Z}_1$  and  $\mathbf{Z}_2$  are  $\ell_2$ -normalized embeddings, so we have,

$$\|\mathbf{C}\|_1 = \max_{1 \leq j \leq m} \sum_{i=1}^m |c_{ij}| \leq \lambda m. \quad (14)$$

<sup>1</sup><https://www.image-net.org/download>

709 Similarly, we can obtain,

$$\|\mathbf{C}\|_\infty = \max_{1 \leq i \leq m} \sum_{j=1}^m |c_{ij}| \leq \lambda m. \quad (15)$$

710 Finally, we go back to Equation (12) and obtain,

$$\|\mathbf{C}\|_2 \leq \sqrt{\|\mathbf{C}\|_1 \|\mathbf{C}\|_\infty} \leq \lambda m. \quad (16)$$

711 To ensure that the convergence condition of Equation (11) can be strictly satisfied, we require,

$$\lambda < \frac{1}{m}, \quad (17)$$

712 or we can equally set  $\epsilon_d^2 > 1$  by adjusting the degree of distortion. Note that in the Section 2.2 of  
 713 the main paper, we simply set  $\epsilon_d^2 = \frac{d}{m}$  for  $d > m$ , which is the case of the preliminary experiments  
 714 on CIFAR-10 [39] (the feature dimension  $d = 2048$  and the batch size  $m = 1024$ ). In practice, we  
 715 empirically find that the Taylor expansion converges over a wide range of  $\epsilon_d$  (see Figure 4(c) and  
 716 Table 5c).

717 **Proof of Equation (4).** Equation (4) is a direct result of Sylvester’s determinant identity, which states  
 718 that if  $A$  and  $B$  are matrices of sizes  $m \times d$  and  $d \times m$ , then we have,

$$\det(\mathbf{I}_m + AB) = \det(\mathbf{I}_d + BA), \quad (18)$$

719 and it can be proved by the following derivation,

$$\begin{aligned} & \det \begin{pmatrix} \mathbf{I} & -B \\ A & \mathbf{I} \end{pmatrix} \det \begin{pmatrix} \mathbf{I} & B \\ 0 & \mathbf{I} \end{pmatrix} \\ &= \det \begin{pmatrix} \mathbf{I} & -B \\ A & \mathbf{I} \end{pmatrix} \begin{pmatrix} \mathbf{I} & B \\ 0 & \mathbf{I} \end{pmatrix} = \det \begin{pmatrix} \mathbf{I} & 0 \\ A & AB + \mathbf{I} \end{pmatrix} = \det(\mathbf{I}_m + AB), \end{aligned} \quad (19)$$

720 and we also have,

$$\begin{aligned} & \det \begin{pmatrix} \mathbf{I} & B \\ 0 & \mathbf{I} \end{pmatrix} \det \begin{pmatrix} \mathbf{I} & -B \\ A & \mathbf{I} \end{pmatrix} \\ &= \det \begin{pmatrix} \mathbf{I} & B \\ 0 & \mathbf{I} \end{pmatrix} \begin{pmatrix} \mathbf{I} & -B \\ A & \mathbf{I} \end{pmatrix} = \det \begin{pmatrix} \mathbf{I} + BA & 0 \\ A & \mathbf{I} \end{pmatrix} = \det(\mathbf{I}_d + BA). \end{aligned} \quad (20)$$

721 So Equation (18) is proved. Let  $A = \lambda \mathbf{Z}_1^\top$  and  $B = \mathbf{Z}_2$ , and using the fact that the determinant  
 722 of the transpose of a square matrix is equal to the determinant of the matrix, then we can prove  
 723 Equation (4),

$$\mathcal{L}_{MEC} = \underbrace{-\mu \log \det(\mathbf{I}_m + \lambda \mathbf{Z}_1^\top \mathbf{Z}_2)}_{\text{batch-wise}} = \underbrace{-\mu \log \det(\mathbf{I}_d + \lambda \mathbf{Z}_1 \mathbf{Z}_2^\top)}_{\text{feature-wise}}. \quad (21)$$

724 **Relation to SimSiam [14] and BYOL [27].** SimSiam [14] uses negative cosine similarity as loss  
 725 function. And it is equivalent to the mean squared error of  $\ell_2$ -normalized vectors, up to a scale of 2,  
 726 which is the loss used in BYOL [27]. We write the loss function of SimSiam [14] as the following  
 727 equation,

$$\mathcal{L}_{SimSiam} = - \sum_{i=1}^m z_1^i \cdot z_2^i, \quad (22)$$

728 where  $z_1^i$  and  $z_2^i$  are the embeddings of two views of the same image  $i$ . By taking Taylor expansion  
 729 (Equation (2)) of the left side of Equation (4), we obtain,

$$\mathcal{L}_{MEC}^{n=1} = - \text{Tr}(\mu \lambda \mathbf{Z}_1^\top \mathbf{Z}_2) = -\mu \lambda \sum_{i=1}^m z_1^i \cdot z_2^i, \quad (23)$$

730 which is equivalent to Equation (22) up to a scale of  $\mu\lambda$ . Since  $\mu\lambda$  is a constant and can be absorbed  
 731 by adjusting the learning rate during optimization, the objective function of SimSiam [14] and  
 732 BYOL [27] can be viewed as the first order expansion of the objective function of MEC.

733 **Relation to Barlow Twins [81] and VICReg [5].** Barlow twins [81] aims to make the cross-  
 734 correlation matrix computed from twin embeddings as close to the identity matrix as possible, with  
 735 an invariance term and a redundancy reduction term. VICReg [5] follows the similar idea by using a  
 736 term that decorrelates each pair of variables along each branch of Siamese networks. The objective  
 737 function of Barlow twins [81] is as follows,

$$\mathcal{L}_{Barlow} = \sum_{i=1}^d (1 - C_{ii})^2 + \lambda_{barlow} \sum_{i=1}^d \sum_{j \neq i}^d C_{ij}^2, \quad (24)$$

738 where  $C$  is the feature-wise cross-correlation matrix and  $\lambda_{barlow}$  is a positive constant. By taking  
 739 Taylor expansion (Equation (2)) of the right side of Equation (4), we obtain,

$$\begin{aligned} \mathcal{L}_{MEC}^{n=2} &= -\text{Tr} \left( \mu\lambda \mathbf{Z}_1 \mathbf{Z}_2^\top - \frac{\mu}{2} \left( \lambda \mathbf{Z}_1 \mathbf{Z}_2^\top \right)^2 \right) \\ &= \mu \sum_{i=1}^d \left( -C_{ii} + \frac{1}{2} C_{ii}^2 \right) + \frac{\mu}{2} \sum_{i=1}^d \sum_{j \neq i}^d C_{ij}^2, \end{aligned} \quad (25)$$

740 where  $C = \lambda \mathbf{Z}_1 \mathbf{Z}_2^\top$ . And the above equations show that the objective function of Equation (24) can  
 741 be viewed as the second-order expansion of the objective function of MEC. We notice that Barlow  
 742 twins [81] uses batch normalization rather than  $\ell_2$  normalization on the embeddings  $z$ , and we show  
 743 that these two kinds of normalization techniques have similar effects on both Barlow twins [81] and  
 our MEC:

| method            | batch norm | $\ell_2$ norm | linear       |
|-------------------|------------|---------------|--------------|
| Barlow Twins [81] | ✓          | ✓             | 67.3<br>67.4 |
| MEC               | ✓          | ✓             | 70.6<br>70.6 |

744

745 **Relation to SimCLR [12] and MoCo [13].** SimCLR [12] and MoCo [13] are two typical contrastive  
 746 learning methods that aim to push negative pairs apart while pulling positive pairs together. And they  
 747 use the following InfoNCE loss function [49],

$$\mathcal{L}_{InfoNCE} = - \sum_{i=1}^m (c_{i,i}/\tau) + \sum_{i=1}^m \log \sum_{j \neq i}^m (\exp(c_{i,j}/\tau) + \exp(c_{i,i}/\tau)) \quad (26)$$

748 where  $\tau$  is the temperature parameter. By taking Taylor expansion (Equation (2)) of the left side of  
 749 Equation (4), we obtain,

$$\mathcal{L}_{MEC}^{n=2} = -\text{Tr} \left( \mu\lambda \mathbf{Z}_1^\top \mathbf{Z}_2 - \frac{\mu}{2} \left( \lambda \mathbf{Z}_1^\top \mathbf{Z}_2 \right)^2 \right) \quad (27)$$

750 We notice that although the above two equations do not take the exactly same forms, they have  
 751 similar effects on the learning process: the first term aims to model the invariance with respect to  
 752 data augmentations; and the second term aims to minimize the similarity between negative samples.

## References

- 753
- 754 [1] M. Andriluka *et al.*, “PoseTrack: A benchmark for human pose estimation and tracking,”  
755 in *Proceedings of the IEEE conference on computer vision and pattern recognition*, 2018,  
756 pp. 5167–5176.
- 757 [2] C. Arndt, S. Robinson, and F. Tarp, “Parameter estimation for a computable general equilibrium  
758 model: A maximum entropy approach,” *Economic Modelling*, vol. 19, no. 3, pp. 375–398,  
759 2002.
- 760 [3] Y. M. Asano, C. Rupprecht, and A. Vedaldi, “Self-labelling via simultaneous clustering and  
761 representation learning,” *arXiv preprint arXiv:1911.05371*, 2019.
- 762 [4] H. Bao, L. Dong, and F. Wei, “Beit: Bert pre-training of image transformers,” *arXiv preprint*  
763 *arXiv:2106.08254*, 2021.
- 764 [5] A. Bardes, J. Ponce, and Y. LeCun, “Vicreg: Variance-invariance-covariance regularization for  
765 self-supervised learning,” *arXiv preprint arXiv:2105.04906*, 2021.
- 766 [6] J. Beirlant, E. J. Dudewicz, L. Györfi, E. C. Van der Meulen, *et al.*, “Nonparametric entropy  
767 estimation: An overview,” *International Journal of Mathematical and Statistical Sciences*,  
768 vol. 6, no. 1, pp. 17–39, 1997.
- 769 [7] L. Bertinetto, J. Valmadre, J. F. Henriques, A. Vedaldi, and P. H. Torr, “Fully-convolutional  
770 siamese networks for object tracking,” in *European conference on computer vision*, Springer,  
771 2016, pp. 850–865.
- 772 [8] J. Bromley, I. Guyon, Y. LeCun, E. Säckinger, and R. Shah, “Signature verification using  
773 a” siamese” time delay neural network,” *Advances in neural information processing systems*,  
774 vol. 6, 1993.
- 775 [9] M. Caron, P. Bojanowski, A. Joulin, and M. Douze, “Deep clustering for unsupervised learning  
776 of visual features,” in *Proceedings of the European Conference on Computer Vision (ECCV)*,  
777 2018, pp. 132–149.
- 778 [10] M. Caron, I. Misra, J. Mairal, P. Goyal, P. Bojanowski, and A. Joulin, “Unsupervised learning of  
779 visual features by contrasting cluster assignments,” *Advances in Neural Information Processing*  
780 *Systems*, vol. 33, pp. 9912–9924, 2020.
- 781 [11] M. Caron *et al.*, “Emerging properties in self-supervised vision transformers,” in *Proceedings*  
782 *of the IEEE/CVF International Conference on Computer Vision*, 2021, pp. 9650–9660.
- 783 [12] T. Chen, S. Kornblith, M. Norouzi, and G. Hinton, “A simple framework for contrastive  
784 learning of visual representations,” in *International conference on machine learning*, PMLR,  
785 2020, pp. 1597–1607.
- 786 [13] X. Chen, H. Fan, R. Girshick, and K. He, “Improved baselines with momentum contrastive  
787 learning,” *arXiv preprint arXiv:2003.04297*, 2020.
- 788 [14] X. Chen and K. He, “Exploring simple siamese representation learning,” in *Proceedings of the*  
789 *IEEE/CVF Conference on Computer Vision and Pattern Recognition*, 2021, pp. 15 750–15 758.
- 790 [15] X. Chen, S. Xie, and K. He, “An empirical study of training self-supervised vision transformers,”  
791 in *Proceedings of the IEEE/CVF International Conference on Computer Vision*, 2021, pp. 9640–  
792 9649.
- 793 [16] T. M. Cover, *Elements of information theory*. John Wiley & Sons, 1999.
- 794 [17] J. Deng, W. Dong, R. Socher, L.-J. Li, K. Li, and L. Fei-Fei, “Imagenet: A large-scale  
795 hierarchical image database,” in *2009 IEEE conference on computer vision and pattern*  
796 *recognition*, Ieee, 2009, pp. 248–255.
- 797 [18] C. Doersch, A. Gupta, and A. A. Efros, “Unsupervised visual representation learning by  
798 context prediction,” in *Proceedings of the IEEE international conference on computer vision*,  
799 2015, pp. 1422–1430.
- 800 [19] A. Dosovitskiy, J. T. Springenberg, M. Riedmiller, and T. Brox, “Discriminative unsuper-  
801 vised feature learning with convolutional neural networks,” *Advances in neural information*  
802 *processing systems*, vol. 27, 2014.
- 803 [20] A. Dosovitskiy *et al.*, “An image is worth 16x16 words: Transformers for image recognition at  
804 scale,” *arXiv preprint arXiv:2010.11929*, 2020.
- 805 [21] A. Dubey, O. Gupta, R. Raskar, and N. Naik, “Maximum-entropy fine grained classification,”  
806 *Advances in neural information processing systems*, vol. 31, 2018.

- 807 [22] A. Ermolov, A. Siarohin, E. Sangineto, and N. Sebe, “Whitening for self-supervised representation learning,” in *International Conference on Machine Learning*, PMLR, 2021, pp. 3015–3024.  
808  
809
- 810 [23] M. Everingham, L. Van Gool, C. K. Williams, J. Winn, and A. Zisserman, “The pascal visual object classes (voc) challenge,” *International journal of computer vision*, vol. 88, no. 2, pp. 303–338, 2010.  
811  
812
- 813 [24] D. Fu *et al.*, “Unsupervised pre-training for person re-identification,” *CVPR*, 2021.  
814
- 815 [25] S. Gidaris, P. Singh, and N. Komodakis, “Unsupervised representation learning by predicting image rotations,” *arXiv preprint arXiv:1803.07728*, 2018.  
816
- 817 [26] P. Goyal *et al.*, “Accurate, large minibatch sgd: Training imagenet in 1 hour,” *arXiv preprint arXiv:1706.02677*, 2017.  
818
- 819 [27] J.-B. Grill *et al.*, “Bootstrap your own latent—a new approach to self-supervised learning,” *Advances in Neural Information Processing Systems*, vol. 33, pp. 21 271–21 284, 2020.  
820
- 821 [28] K. He, X. Chen, S. Xie, Y. Li, P. Dollár, and R. Girshick, “Masked autoencoders are scalable vision learners,” in *Proceedings of the IEEE/CVF Conference on Computer Vision and Pattern Recognition*, 2022.  
822
- 823 [29] K. He, H. Fan, Y. Wu, S. Xie, and R. Girshick, “Momentum contrast for unsupervised visual representation learning,” in *Proceedings of the IEEE/CVF conference on computer vision and pattern recognition*, 2020, pp. 9729–9738.  
824  
825
- 826 [30] K. He, G. Gkioxari, P. Dollár, and R. Girshick, “Mask r-cnn,” in *Proceedings of the IEEE international conference on computer vision*, 2017, pp. 2961–2969.  
827
- 828 [31] K. He, X. Zhang, S. Ren, and J. Sun, “Deep residual learning for image recognition,” in *Proceedings of the IEEE conference on computer vision and pattern recognition*, 2016, pp. 770–778.  
829  
830
- 831 [32] R. D. Hjelm *et al.*, “Learning deep representations by mutual information estimation and maximization,” *arXiv preprint arXiv:1808.06670*, 2018.  
832
- 833 [33] R. A. Horn and C. R. Johnson, *Matrix analysis*. Cambridge university press, 2012.  
834
- 835 [34] T. Hua, W. Wang, Z. Xue, S. Ren, Y. Wang, and H. Zhao, “On feature decorrelation in self-supervised learning,” in *Proceedings of the IEEE/CVF International Conference on Computer Vision*, 2021, pp. 9598–9608.  
836  
837
- 838 [35] S. Ioffe and C. Szegedy, “Batch normalization: Accelerating deep network training by reducing internal covariate shift,” in *International conference on machine learning*, PMLR, 2015, pp. 448–456.  
839
- 840 [36] E. T. Jaynes, “Information theory and statistical mechanics,” *Physical review*, vol. 106, no. 4, p. 620, 1957.  
841
- 842 [37] E. T. Jaynes, “Information theory and statistical mechanics. ii,” *Physical review*, vol. 108, no. 2, p. 171, 1957.  
843
- 844 [38] J. N. Kapur, *Maximum-entropy models in science and engineering*. John Wiley & Sons, 1989.  
845
- 846 [39] A. Krizhevsky, “Learning multiple layers of features from tiny images,” *Master’s thesis, University of Tront*, 2009.  
847
- 848 [40] T.-Y. Lin *et al.*, “Microsoft coco: Common objects in context,” in *European conference on computer vision*, Springer, 2014, pp. 740–755.  
849
- 850 [41] R. Linsker, “Self-organization in a perceptual network,” *Computer*, vol. 21, no. 3, pp. 105–117, 1988.  
851
- 852 [42] I. Loshchilov and F. Hutter, “Sgdr: Stochastic gradient descent with warm restarts,” *arXiv preprint arXiv:1608.03983*, 2016.  
853
- 854 [43] Y. Ma, H. Derksen, W. Hong, and J. Wright, “Segmentation of multivariate mixed data via lossy data coding and compression,” *IEEE transactions on pattern analysis and machine intelligence*, vol. 29, no. 9, pp. 1546–1562, 2007.  
855
- 856 [44] A. Milan, L. Leal-Taixé, I. Reid, S. Roth, and K. Schindler, “Mot16: A benchmark for multi-object tracking,” *arXiv preprint arXiv:1603.00831*, 2016.  
857
- 858 [45] V. Mnih *et al.*, “Asynchronous methods for deep reinforcement learning,” in *International conference on machine learning*, PMLR, 2016, pp. 1928–1937.  
859
- 860 [46] V. Nair and G. E. Hinton, “Rectified linear units improve restricted boltzmann machines,” in *Icml*, 2010.  
861

- 862 [47] T. K. Nakamura, “Statistical mechanics of a collisionless system based on the maximum  
863 entropy principle,” *The Astrophysical Journal*, vol. 531, no. 2, p. 739, 2000.
- 864 [48] M. Noroozi and P. Favaro, “Unsupervised learning of visual representations by solving jigsaw  
865 puzzles,” in *European conference on computer vision*, Springer, 2016, pp. 69–84.
- 866 [49] A. v. d. Oord, Y. Li, and O. Vinyals, “Representation learning with contrastive predictive  
867 coding,” *arXiv preprint arXiv:1807.03748*, 2018.
- 868 [50] L. Paninski, “Estimation of entropy and mutual information,” *Neural computation*, vol. 15,  
869 no. 6, pp. 1191–1253, 2003.
- 870 [51] D. Pathak, P. Krahenbuhl, J. Donahue, T. Darrell, and A. A. Efros, “Context encoders: Feature  
871 learning by inpainting,” in *Proceedings of the IEEE conference on computer vision and pattern  
872 recognition*, 2016, pp. 2536–2544.
- 873 [52] F. Perazzi, J. Pont-Tuset, B. McWilliams, L. Van Gool, M. Gross, and A. Sorkine-Hornung, “A  
874 benchmark dataset and evaluation methodology for video object segmentation,” in *Proceedings  
875 of the IEEE conference on computer vision and pattern recognition*, 2016, pp. 724–732.
- 876 [53] G. Pereyra, G. Tucker, J. Chorowski, Ł. Kaiser, and G. Hinton, “Regularizing neural networks  
877 by penalizing confident output distributions,” *arXiv preprint arXiv:1701.06548*, 2017.
- 878 [54] S. Pressé, K. Ghosh, J. Lee, and K. A. Dill, “Principles of maximum entropy and maximum  
879 caliber in statistical physics,” *Reviews of Modern Physics*, vol. 85, no. 3, p. 1115, 2013.
- 880 [55] *Principle of Maximum Entropy*, [https://en.wikipedia.org/wiki/Principle\\_of\\_](https://en.wikipedia.org/wiki/Principle_of_maximum_entropy)  
881 [maximum\\_entropy](https://en.wikipedia.org/wiki/Principle_of_maximum_entropy).
- 882 [56] S. Ren, K. He, R. Girshick, and J. Sun, “Faster r-cnn: Towards real-time object detection  
883 with region proposal networks,” *Advances in neural information processing systems*, vol. 28,  
884 pp. 91–99, 2015.
- 885 [57] E. Scharfenaker and J. Yang, “Maximum entropy economics,” *The European Physical Journal  
886 Special Topics*, vol. 229, no. 9, pp. 1577–1590, 2020.
- 887 [58] C. E. Shannon, “A mathematical theory of communication,” *The Bell system technical journal*,  
888 vol. 27, no. 3, pp. 379–423, 1948.
- 889 [59] J. Shawe-Taylor and D. Haldon, “Pac-bayes analysis of maximum entropy classification,” in  
890 *Artificial Intelligence and Statistics*, PMLR, 2009, pp. 480–487.
- 891 [60] Y. Taigman, M. Yang, M. Ranzato, and L. Wolf, “Deepface: Closing the gap to human-level  
892 performance in face verification,” in *Proceedings of the IEEE conference on computer vision  
893 and pattern recognition*, 2014, pp. 1701–1708.
- 894 [61] C. Tao *et al.*, “Exploring the equivalence of siamese self-supervised learning via a unified  
895 gradient framework,” *arXiv preprint arXiv:2112.05141*, 2021.
- 896 [62] Y. Tian, D. Krishnan, and P. Isola, “Contrastive multiview coding,” in *European conference on  
897 computer vision*, Springer, 2020, pp. 776–794.
- 898 [63] Y. Tian, C. Sun, B. Poole, D. Krishnan, C. Schmid, and P. Isola, “What makes for good views  
899 for contrastive learning?” *arXiv preprint arXiv:2005.10243*, 2020.
- 900 [64] Y.-H. H. Tsai, M. Q. Ma, M. Yang, H. Zhao, L.-P. Morency, and R. Salakhutdinov,  
901 “Self-supervised representation learning with relative predictive coding,” *arXiv preprint  
902 arXiv:2103.11275*, 2021.
- 903 [65] M. Tschannen, J. Djolonga, P. K. Rubenstein, S. Gelly, and M. Lucic, “On mutual information  
904 maximization for representation learning,” *arXiv preprint arXiv:1907.13625*, 2019.
- 905 [66] L. Van der Maaten and G. Hinton, “Visualizing data using t-sne,” *Journal of machine learning  
906 research*, vol. 9, no. 11, 2008.
- 907 [67] R. Vidal, Y. Ma, and S. Sastry, “Generalized principal component analysis (gpca),” *IEEE  
908 transactions on pattern analysis and machine intelligence*, vol. 27, no. 12, pp. 1945–1959,  
909 2005.
- 910 [68] P. Voigtlaender *et al.*, “Mots: Multi-object tracking and segmentation,” in *Proceedings of the  
911 IEEE/CVF Conference on Computer Vision and Pattern Recognition*, 2019, pp. 7942–7951.
- 912 [69] F. Wang and H. Liu, “Understanding the behaviour of contrastive loss,” in *Proceedings of the  
913 IEEE/CVF conference on computer vision and pattern recognition*, 2021, pp. 2495–2504.
- 914 [70] T. Wang and P. Isola, “Understanding contrastive representation learning through alignment  
915 and uniformity on the hypersphere,” in *International Conference on Machine Learning*, PMLR,  
916 2020, pp. 9929–9939.

- 917 [71] Z. Wang, H. Zhao, Y.-L. Li, S. Wang, P. Torr, and L. Bertinetto, “Do different tracking tasks  
918 require different appearance models?” *Advances in Neural Information Processing Systems*,  
919 vol. 34, 2021.
- 920 [72] R. J. Williams and J. Peng, “Function optimization using connectionist reinforcement learning  
921 algorithms,” *Connection Science*, vol. 3, no. 3, pp. 241–268, 1991.
- 922 [73] Y. Wu, J. Lim, and M.-H. Yang, “Online object tracking: A benchmark,” in *Proceedings of the  
923 IEEE conference on computer vision and pattern recognition*, 2013, pp. 2411–2418.
- 924 [74] Y. Wu, A. Kirillov, F. Massa, W.-Y. Lo, and R. Girshick, *Detectron2*, [https://github.com/  
925 facebookresearch/detectron2](https://github.com/facebookresearch/detectron2), 2019.
- 926 [75] Z. Wu, Y. Xiong, S. X. Yu, and D. Lin, “Unsupervised feature learning via non-parametric  
927 instance discrimination,” in *Proceedings of the IEEE conference on computer vision and  
928 pattern recognition*, 2018, pp. 3733–3742.
- 929 [76] E. Xie *et al.*, “Detco: Unsupervised contrastive learning for object detection,” in  
930 *arXiv:2102.04803*, 2021.
- 931 [77] Z. Xie, Y. Lin, Z. Zhang, Y. Cao, S. Lin, and H. Hu, “Propagate yourself: Exploring pixel-level  
932 consistency for unsupervised visual representation learning,” in *CVPR*, 2021.
- 933 [78] D. Xu, J. Xiao, Z. Zhao, J. Shao, D. Xie, and Y. Zhuang, “Self-supervised spatiotemporal  
934 learning via video clip order prediction,” in *Proceedings of the IEEE/CVF Conference on  
935 Computer Vision and Pattern Recognition*, 2019, pp. 10 334–10 343.
- 936 [79] Y. You, I. Gitman, and B. Ginsburg, “Large batch training of convolutional networks,” *arXiv  
937 preprint arXiv:1708.03888*, 2017.
- 938 [80] Y. Yu, K. H. R. Chan, C. You, C. Song, and Y. Ma, “Learning diverse and discriminative  
939 representations via the principle of maximal coding rate reduction,” *Advances in Neural  
940 Information Processing Systems*, vol. 33, pp. 9422–9434, 2020.
- 941 [81] J. Zbontar, L. Jing, I. Misra, Y. LeCun, and S. Deny, “Barlow twins: Self-supervised learning  
942 via redundancy reduction,” in *International Conference on Machine Learning*, PMLR, 2021,  
943 pp. 12 310–12 320.
- 944 [82] R. Zhang, P. Isola, and A. A. Efros, “Colorful image colorization,” in *European conference on  
945 computer vision*, Springer, 2016, pp. 649–666.
- 946 [83] R. Zhang, P. Isola, and A. A. Efros, “Split-brain autoencoders: Unsupervised learning by  
947 cross-channel prediction,” in *Proceedings of the IEEE Conference on Computer Vision and  
948 Pattern Recognition*, 2017, pp. 1058–1067.
- 949 [84] J. Zhou *et al.*, “Ibot: Image bert pre-training with online tokenizer,” *arXiv preprint  
950 arXiv:2111.07832*, 2021.
